# Supplementary material for: Cyclic Expression of Lhx2 Regulates Hair Formation
Source: PubMed Central journal article supplement (PMC2851574; doi:10.1371/journal.pgen.1000904), 2010-04-08
Supplement: pgen.1000904.s008.pdf [file pgen.1000904.s008.pdf]

**Table S1. Hair cycle stage of back skin HF's in control mice at different ages.**

| Mouse identity | Sex | Genotype                          | Age     | Hair cycle phase Actual <sup>1</sup> | Hair cycle phase Predicted <sup>2</sup> |
|----------------|-----|-----------------------------------|---------|--------------------------------------|-----------------------------------------|
| 1595-1         | ND  | <i>Nes-Cre</i>                    | 1w. 1d. | Morphogenesis                        | Morphogenesis                           |
| 1595-3         | ND  | <i>Z/Lhx2-GFP</i>                 | 1w. 1d. | Morphogenesis                        | Morphogenesis                           |
| 1595-4         | ND  | <i>Nes-Cre</i>                    | 1w. 1d. | Morphogenesis                        | Morphogenesis                           |
| 1595-5         | ND  | <i>WT</i>                         | 1w. 1d. | Morphogenesis                        | Morphogenesis                           |
| 1662-1         | ND  | <i>Nestin-Cre</i>                 | 1w. 1d. | Morphogenesis                        | Morphogenesis                           |
| 1662-2         | ND  | <i>Z/Lhx2-GFP</i>                 | 1w. 1d. | Morphogenesis                        | Morphogenesis                           |
| 1662-3         | ND  | <i>WT</i>                         | 1w. 1d. | Morphogenesis                        | Morphogenesis                           |
| 1662-4         | ND  | <i>WT</i>                         | 1w. 1d. | Morphogenesis                        | Morphogenesis                           |
| 3056-1         | ♀   | <i>WT</i>                         | 3w. 1d. | Telogen                              | Telogen                                 |
| 3056-2         | ♀   | <i>WT</i>                         | 3w. 1d. | Telogen                              | Telogen                                 |
| 3049-1         | ♂   | <i>WT</i>                         | 3w. 4d. | Anagen (I-II)                        | Telogen                                 |
| 3049-2         | ♂   | <i>WT</i>                         | 3w. 4d. | Anagen (III)                         | Telogen                                 |
| 3049-3         | ♀   | <i>WT</i>                         | 3w. 5d. | Telogen                              | Telogen                                 |
| 3049-4         | ♂   | <i>WT</i>                         | 3w. 5d. | Anagen (IV-V)                        | Telogen                                 |
| 3049-5         | ♂   | <i>WT</i>                         | 3w. 6d. | Anagen (IV-V)                        | Telogen                                 |
| 3347           | ♂   | <i>Lhx2<sup>+/-</sup></i>         | 4w.     | Anagen (IV-V)                        | Anagen                                  |
| 3346           | ♂   | <i>Lhx2<sup>+/-</sup></i>         | 4w.     | Anagen (VI)                          | Anagen                                  |
| 3348           | ♂   | <i>Lhx2<sup>+/-</sup></i>         | 4w.     | Anagen (VI)                          | Anagen                                  |
| 2694           | ♂   | <i>Z/Lhx2-GFP</i>                 | 4w. 1d. | Telogen                              | Anagen                                  |
| 2664           | ♂   | <i>WT</i>                         | 4w. 3d. | Anagen (VI)                          | Anagen                                  |
| B3             | ♀   | <i>Lhx2<sup>fllox/fllox</sup></i> | 4w. 3d. | Anagen (I-III)                       | Anagen                                  |
| 2691           | ♂   | <i>WT</i>                         | 5w.     | Anagen (VI)                          | Anagen                                  |
| B1             | ♂   | <i>Lhx2<sup>fllox/-</sup></i>     | 5w.     | Anagen (III)                         | Anagen                                  |
| B2             | ♀   | <i>Lhx2<sup>fllox/-</sup></i>     | 5w. 1d. | Anagen (V-VI)                        | Anagen                                  |
| 1858           | ♂   | <i>Nes-Cre</i>                    | 5w. 3d. | Anagen (VI)                          | Anagen                                  |
| 2687           | ♀   | <i>WT</i>                         | 5w. 3d. | Anagen (VI)                          | Anagen                                  |
| B10            | ♀   | <i>Lhx2<sup>fllox/-</sup></i>     | 5w. 3d. | Anagen (VI)                          | Anagen                                  |
| 1859           | ♂   | <i>WT</i>                         | 5w. 3d. | Catagen (III-IV)                     | Anagen                                  |
| 1973           | ♀   | <i>WT</i>                         | 5w. 5d. | Anagen (VI)                          | Anagen                                  |
| 1971           | ♂   | <i>WT</i>                         | 5w. 5d. | Catagen (V-VI)                       | Anagen                                  |
| S2             | ♂   | <i>Lhx2<sup>fllox/-</sup></i>     | 5w. 6d. | Anagen (VI)                          | Anagen                                  |
| S3             | ♀   | <i>Lhx2<sup>fllox/fllox</sup></i> | 5w. 6d. | Anagen (VI)                          | Anagen                                  |
| 2689           | ♀   | <i>WT</i>                         | 6w.     | Telogen                              | Catagen                                 |
| 2839           | ♂   | <i>CreER</i>                      | 6w. 4d. | Catagen (II-III)                     | Catagen                                 |
| 3087           | ♀   | <i>WT</i>                         | 6w. 6d. | Anagen (VI)                          | Catagen                                 |
| 3088           | ♀   | <i>WT</i>                         | 6w. 6d. | Anagen (VI)                          | Catagen                                 |
| 3086           | ♂   | <i>WT</i>                         | 6w. 6d. | Telogen                              | Catagen                                 |
| 2945           | ♂   | <i>Z/Lhx2-GFP</i>                 | 7w.     | Anagen (VI)                          | Telogen                                 |
| 2954           | ♀   | <i>WT</i>                         | 7w.     | Anagen (VI)                          | Telogen                                 |
| 2955           | ♀   | <i>Z/Lhx2-GFP</i>                 | 7w.     | Anagen (VI)                          | Telogen                                 |

|      |   |                           |          |                       |         |
|------|---|---------------------------|----------|-----------------------|---------|
| 2956 | ♀ | <i>CreER</i>              | 7w.      | Anagen (VI)           | Telogen |
| 2946 | ♀ | <i>CreER</i>              | 7w.      | Telogen               | Telogen |
| 2950 | ♂ | <i>WT</i>                 | 7w.      | Telogen               | Telogen |
| 2951 | ♂ | <i>CreER</i>              | 7w.      | Telogen               | Telogen |
| 2803 | ♂ | <i>CreER</i>              | 7w. 3d.  | Telogen               | Telogen |
| 2804 | ♂ | <i>CreER</i>              | 7w. 3d.  | Telogen               | Telogen |
| 2308 | ♂ | <i>Lhx2<sup>+/-</sup></i> | 8w. 1d.  | Telogen               | Telogen |
| 1796 | ♂ | <i>Z/Lhx2-GFP</i>         | 8w. 2d.  | Telogen               | Telogen |
| 3149 | ♀ | <i>Z/Lhx2-GFP</i>         | 8w. 2d.  | Telogen               | Telogen |
| 3151 | ♀ | <i>WT</i>                 | 8w. 2d.  | Telogen               | Telogen |
| 3152 | ♀ | <i>CreER</i>              | 8w. 2d.  | Telogen               | Telogen |
| 1434 | ♂ | <i>WT</i>                 | 8w. 4d.  | Telogen               | Telogen |
| 1435 | ♂ | <i>CreER</i>              | 8w. 4d.  | Telogen               | Telogen |
| 2    | ♂ | <i>Z/Lhx2-GFP</i>         | 9w.      | Telogen               | Telogen |
| 3    | ♂ | <i>WT</i>                 | 9w.      | Telogen               | Telogen |
| 5    | ♀ | <i>CreER</i>              | 9w.      | Telogen               | Telogen |
| 6    | ♀ | <i>Z/Lhx2-GFP</i>         | 9w.      | Telogen               | Telogen |
| 7    | ♀ | <i>WT</i>                 | 9w.      | Telogen               | Telogen |
| 2699 | ♀ | <i>CreER</i>              | 9w.      | Anagen (VI)           | Telogen |
| 2701 | ♀ | <i>CreER</i>              | 9w.      | Telogen               | Telogen |
| 2786 | ♂ | <i>CreER</i>              | 9w.      | Telogen               | Telogen |
| 2845 | ♂ | <i>WT</i>                 | 9w.      | Telogen               | Telogen |
| 2848 | ♀ | <i>CreER</i>              | 9w.      | Telogen               | Telogen |
| 2849 | ♀ | <i>CreER</i>              | 9w.      | Telogen               | Telogen |
| 3387 | ♂ | <i>WT</i>                 | 9w.      | Telogen               | Telogen |
| 3392 | ♂ | <i>Z/Lhx2</i>             | 9w.      | Telogen               | Telogen |
| 3444 | ♂ | <i>Z/Lhx2</i>             | 9w.      | Telogen               | Telogen |
| 3449 | ♀ | <i>CreER</i>              | 9w.      | Telogen               | Telogen |
| 3453 | ♀ | <i>Z/Lhx2</i>             | 9w.      | Telogen               | Telogen |
| 3487 | ♂ | <i>Z/Lhx2</i>             | 9w.      | Telogen               | Telogen |
| 3489 | ♂ | <i>CreER</i>              | 9w.      | Telogen               | Telogen |
| 3490 | ♂ | <i>Z/Lhx2</i>             | 9w.      | Telogen               | Telogen |
| 3488 | ♂ | <i>CreER</i>              | 9w.      | Telogen               | Telogen |
| 3491 | ♂ | <i>WT</i>                 | 9w.      | Telogen               | Telogen |
| 1419 | ♂ | <i>WT</i>                 | 9w. 1d.  | Telogen               | Telogen |
| 1420 | ♂ | <i>Z/Lhx2-GFP</i>         | 9w. 1d.  | Telogen               | Telogen |
| 1787 | ♂ | <i>Nestin-Cre</i>         | 9w. 1d.  | Telogen               | Telogen |
| 2805 | ♀ | <i>CreER</i>              | 9w. 1d.  | Telogen               | Telogen |
| 3155 | ♂ | <i>Lhx2<sup>+/-</sup></i> | 9w. 2d.  | Telogen               | Telogen |
| 3173 | ♀ | <i>Lhx2<sup>+/-</sup></i> | 9w. 6d.  | Telogen               | Telogen |
| 3217 | ♂ | <i>WT</i>                 | 10w. 1d. | Telogen               | Telogen |
| 3148 | ♂ | <i>WT</i>                 | 10w. 4d. | Telogen               | Telogen |
| 2787 | ♀ | <i>CreER</i>              | 10w. 5d. | Telogen               | Telogen |
| 1923 | ♀ | <i>Nes-Cre</i>            | 11w.     | Telogen               | Telogen |
| 3218 | ♂ | <i>WT</i>                 | 11w.     | Telogen               | Telogen |
| 1958 | ♀ | <i>Nes-Cre</i>            | 11w. 6d. | Anagen (IV-V)/Telogen | Telogen |
| 3132 | ♂ | <i>WT</i>                 | 12w. 2d. | Telogen               | Anagen  |

|      |   |                   |          |                       |        |
|------|---|-------------------|----------|-----------------------|--------|
| 1852 | ♂ | <i>Z/Lhx2-GFP</i> | 12w. 4d. | Telogen               | Anagen |
| 1856 | ♀ | <i>WT</i>         | 12w. 4d. | Telogen               | Anagen |
| 1968 | ♀ | <i>Z/Lhx2-GFP</i> | 13w.     | Telogen               | Anagen |
| 1751 | ♂ | <i>Z/Lhx2-GFP</i> | 13w. 5d. | Telogen               | Anagen |
| 1646 | ♂ | <i>Z/Lhx2-GFP</i> | 14w. 4d. | Telogen               | NA     |
| 1965 | ♂ | <i>Z/Lhx2-GFP</i> | 14w. 6d. | Telogen               | NA     |
| 1967 | ♂ | <i>Z/Lhx2-GFP</i> | 15w. 6d. | Anagen (IV-V)/Telogen | NA     |
| 1790 | ♀ | <i>Nes-CRE</i>    | 16w. 2d. | Anagen (VI)           | NA     |
| 1857 | ♀ | <i>Nes-Cre</i>    | 16w. 2d. | Anagen (VI)           | NA     |
| 1792 | ♀ | <i>Nes-Cre</i>    | 18w.     | Telogen               | NA     |
| 1590 | ♀ | <i>Z/Lhx2-GFP</i> | 18w. 4d. | Telogen               | NA     |
| 1644 | ♂ | <i>Z/Lhx2-GFP</i> | 20w. 1d. | Telogen               | NA     |
| 1586 | ♂ | <i>Nes-Cre</i>    | 26w. 3d. | Telogen               | NA     |

<sup>1</sup> Hair cycle stage and sub-stage is determined according to Müller-Röver et al. [29]. Both an anterior and a posterior part of back skin were analysed except in the 1w. 1d. old mice where a midsection of the back skin was analysed.

<sup>2</sup> Predicted hair follicle cycle in female C57BL/6 mice according to Müller-Röver et al. [29].

ND Not determined

NA Not applicable, hair follicle cycles becomes increasingly asynchronous at this age
